# Supplementary material
Source: publisher figshare collection journal article supplement (https://acs.figshare.com/ndownloader/files/6915242)
Supplement: Supplementary file 1 [file 6915242]

Compound	SMILES	% Inh @ 2 µM	Ki [nM]
1	OC=1C=C(C=CC1O)C1=CC=CC(=N1)C(=O)C1=CC(=C(C=C1)F)O	69%	7±1
6	FC1=C(C=C(C=C1)C(=O)C1=NC(=CC=C1)C1=CC(=C(C=C1)O)C)O	60%	26±3
8	FC1=C(C=C(C=C1)C(=O)C1=NC(=CC=C1)C1=CC(=C(C=C1)O)F)O	67%	36±5
9	FC1=C(C=C(C=C1)C(=O)C1=NC(=CC=C1)C1=C(C(=CC=C1)O)F)O	72%	16±7
10	FC1=C(C(=C(C=C1)C(=O)C1=NC(=CC=C1)C1=C(C(=CC=C1)O)F)O)O	76%	8±4
11	FC1=C(C=CC(=C1O)F)C(=O)C1=NC(=CC=C1)C1=C(C(=CC=C1)O)F	72%	9±4
12	OC1=C(C=CC=C1O)C(=O)C1=NC(=CC=C1)C1=C(C(=CC=C1)O)F	65%	64±5
13	FC1=C(C=CC=C1O)C1=CC=CC(=N1)C(=O)C1=C(C=CC=C1)O	66%	135±2
14	FC1=C(C=CC=C1O)C1=CC=CC(=N1)C(=O)C1=C(C(=C(C=C1)O)O)O	25%	405±177
15	FC1=C(C=CC=C1O)C1=CC=CC(=N1)C(=O)C1=C(C(=CC=C1O)O)O	11%	796±122
16a	FC1=C(C=C(C=C1)C(=O)C1=NC(=CC=C1)C1=CC=CC=C1)OC	7%	ni
16	C1=C(C=C(C=C1)C(=O)C1=NC(=CC=C1)C1=CC=CC=C1)O	57%	63±3
17	CN(C)C=1C=C(C=CC1)C1=CC=CC(=N1)C(=O)C1=CC(=C(C=C1)F)O	57%	7±1
18	FC1=C(C=C(C=C1)C(=O)C1=NC(=CC=C1)C1=CC(=CC=C1)O)O	65%	22±4
19	OC1=C(C=CC=C1O)C(=O)C1=NC(=CC=C1)C1=CC(=CC=C1)O	51%	44±3
20	FC1=C(C=C(C=C1)C=1[C]=NC(=CC1)C1=CC(=C(C=C1)C)O)O	64%	47±7
21	C1=C(C=C(C=C1)C(=O)C1=NC(=CC=C1)C1=CC=C(C=C1)F)O	37%	221±46
22	ClC=1C=C(C=CC1F)C1=CC=CC(=N1)C(=O)C1=CC(=C(C=C1)F)O	44%	190±45
23a	FC1=C(C=C(C=C1)C(=O)C1=NC=C(C=C1)C1=CC(=C(C=C1)O)F)O	12%	-
23	FC1=C(C=C(C=C1)C(=O)C1=NC=C(C=C1)C1=CC(=C(C=C1)OC)F)OC	61%	17±5
24	FC1=C(C=C(C=C1)C(=O)C1=NC=CC=C1)O	13%	1541±146
25	FC1=C(C=C(C=C1)C(=O)C1=NC(=CC=C1)C1=CSC=C1)O	50%	97±28
26	FC1=C(C=C(C=C1)C(=O)C1=NC(=CC=C1)N1CCCCC1)O	43%	407±16
27	FC1=C(C=C(C=C1)C(=O)C1=NC(=CC=C1)N1CCN(CC1)C)O	31%	190±21
28	FC1=C(C=C(C=C1)C(=O)C1=NC(=CC=C1)OC1=CC=CC=C1)O	55%	50±0
29	OC1=C(C=CC=C1O)C(=O)C=1C=C(C=CC1)C1=C(C(=CC=C1)O)F	60%	21±2
30	OC1=C(C=CC=C1O)C(=O)C1=[N+](C(=CC=C1)C1=C(C(=CC=C1)O)F)[O-]	47%	132±13
31	OC1=C(C=C(C=C1)C=1C=CC(=NC1C1=CC(=C(C=C1)O)C)C(=O)C1=CC(=C(C=C1)F)O)C	71%	11±8
32	FC1=C(C=C(C=C1)C(=O)C1=NC(=C(C=C1)C1=C(C(=CC=C1)O)F)C1=CC(=C(C=C1)O)C)O	63%	15±4
33	FC1=C(C=C(C=C1)C(=O)C1=NC(=CC(=C1)CO)C1=C(C(=CC=C1)O)F)O	47%	86±7
